# Supplementary material for: Ubiquitin ligase and signalling hub MYCBP2 is required for efficient EPHB2 tyrosine kinase receptor function
Source: eLife journal article supplement (doi:10.7554/elife.89176), 2023-07-21
Supplement: fig6-data2 [file elife-89176-fig6-data2-v1.zip]

Figure 6C

GFP-FBD1 - mut WT  
EPHB2-FLAG + + +

GFP-FBD1 - mut WT  
EPHB2-FLAG + + +

FLAG IP

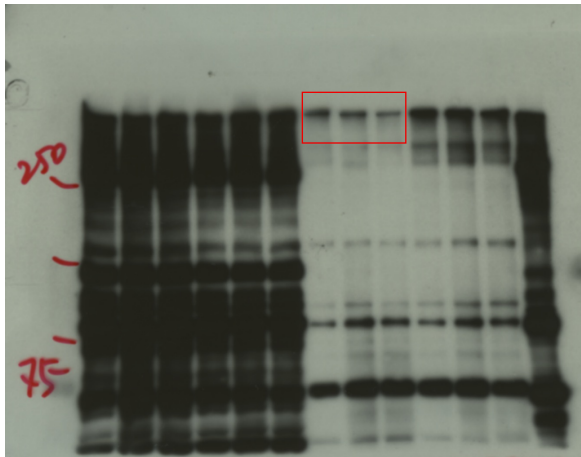

MYCBP2

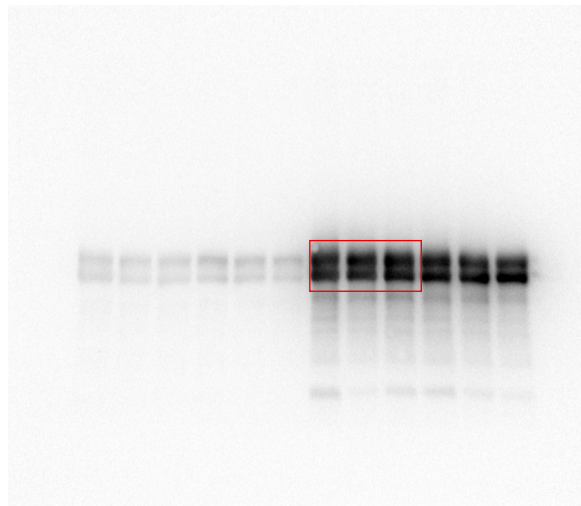

FLAG  
(EPHB2)

LYSATE

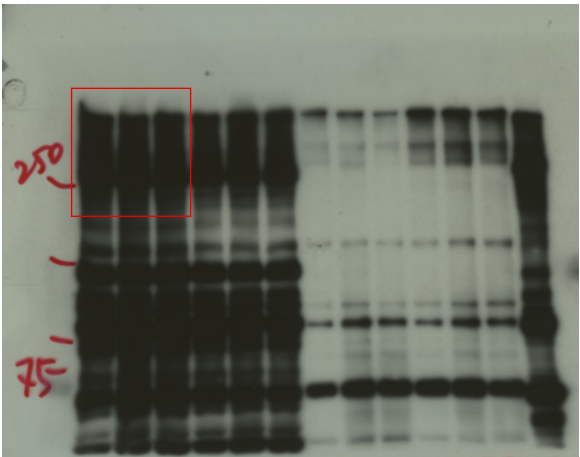

MYCBP2

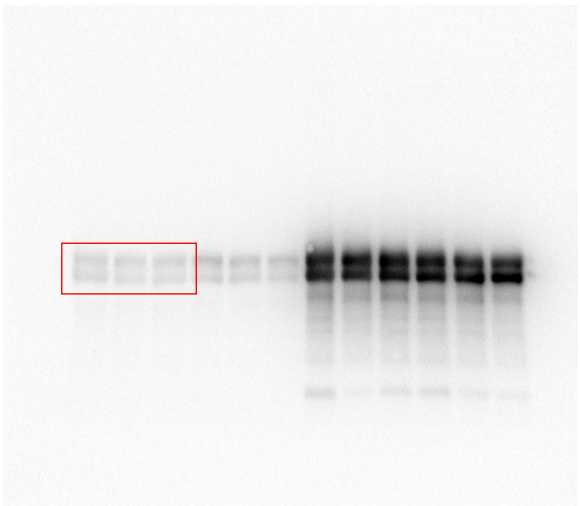

FLAG  
(EPHB2)

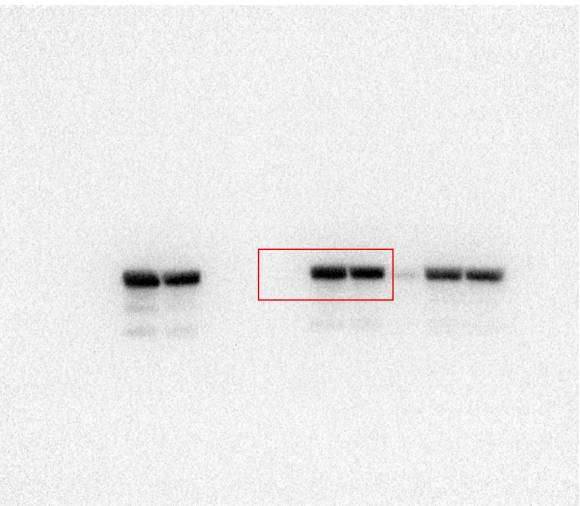

GFP
