# Supplementary material for: Ubiquitin ligase and signalling hub MYCBP2 is required for efficient EPHB2 tyrosine kinase receptor function
Source: eLife. 2024 Jan 30;12:RP89176. doi: 10.7554/eLife.89176 (PMC10945567; doi:10.7554/eLife.89176)
Supplement: Figure 1—source data 1. [file elife-89176-fig1-data1.zip]

Archive with 8 entries (8 files):
- Figure 1 - source data 1/Figure 1C - FLAG IP.tif
- Figure 1 - source data 1/Figure 1C - FLAG Lysate.tif
- Figure 1 - source data 1/Figure 1C - MYCBP2 IP.tif
- Figure 1 - source data 1/Figure 1C - MYCBP2 Lysate.tif
- Figure 1 - source data 1/Figure 1D - EPHB2-FLAG IP.tif
- Figure 1 - source data 1/Figure 1D - EPHB2-FLAG Lysate.tif
- Figure 1 - source data 1/Figure 1D - MYCBP2 IP Lysate.tif
- Figure 1 - source data 1/Figure 1-Source data 1.pdf
