# Supplementary material for: Ubiquitin ligase and signalling hub MYCBP2 is required for efficient EPHB2 tyrosine kinase receptor function
Source: eLife. 2024 Jan 30;12:RP89176. doi: 10.7554/eLife.89176 (PMC10945567; doi:10.7554/eLife.89176)
Supplement: Figure 1—source data 2. [file elife-89176-fig1-data2.zip]

Archive with 5 entries (5 files):
- Figure 1 - source data 2/Figure 1F - EPHB2.tif
- Figure 1 - source data 2/Figure 1F - MYCBP2.tif
- Figure 1 - source data 2/Figure 1G - EPHB2 .tif
- Figure 1 - source data 2/Figure 1G - MYCBP2.tif
- Figure 1 - source data 2/Figure 1-source data 2.pdf
