# Supplementary material for: Ubiquitin ligase and signalling hub MYCBP2 is required for efficient EPHB2 tyrosine kinase receptor function
Source: eLife. 2024 Jan 30;12:RP89176. doi: 10.7554/eLife.89176 (PMC10945567; doi:10.7554/eLife.89176)
Supplement: Figure 4—source data 2. [file elife-89176-fig4-data2.zip]

Archive with 5 entries (5 files):
- Figure 4 - source data 2/Figure 4F - FLAG(EPHB2) and Actin 1h.tif
- Figure 4 - source data 2/Figure 4F - FLAG(EPHB2) and Actin 2h.tif
- Figure 4 - source data 2/Figure 4F - FLAG(EPHB2) and Actin 4h 8h.tif
- Figure 4 - source data 2/Figure 4F- FLAG(EPHB2) and Actin no treatment.tif
- Figure 4 - source data 2/Figure 4-source data 2.pdf
