# Supplementary material for: Ubiquitin ligase and signalling hub MYCBP2 is required for efficient EPHB2 tyrosine kinase receptor function
Source: eLife. 2024 Jan 30;12:RP89176. doi: 10.7554/eLife.89176 (PMC10945567; doi:10.7554/eLife.89176)
Supplement: Figure 4—source data 4. [file elife-89176-fig4-data4.zip]

Archive with 4 entries (4 files):
- Figure 4 - source data 4/Figure 4 - source data 4.pdf
- Figure 4 - source data 4/Figure 4L - B-actin.tif
- Figure 4 - source data 4/Figure 4L - GFP.tif
- Figure 4 - source data 4/Figure 4L - HA.tif
