# Supplementary figures and images for: Ubiquitin ligase and signalling hub MYCBP2 is required for efficient EPHB2 tyrosine kinase receptor function
Source: eLife journal article supplement (doi:10.7554/elife.89176), 2023-07-21

Figure 1C

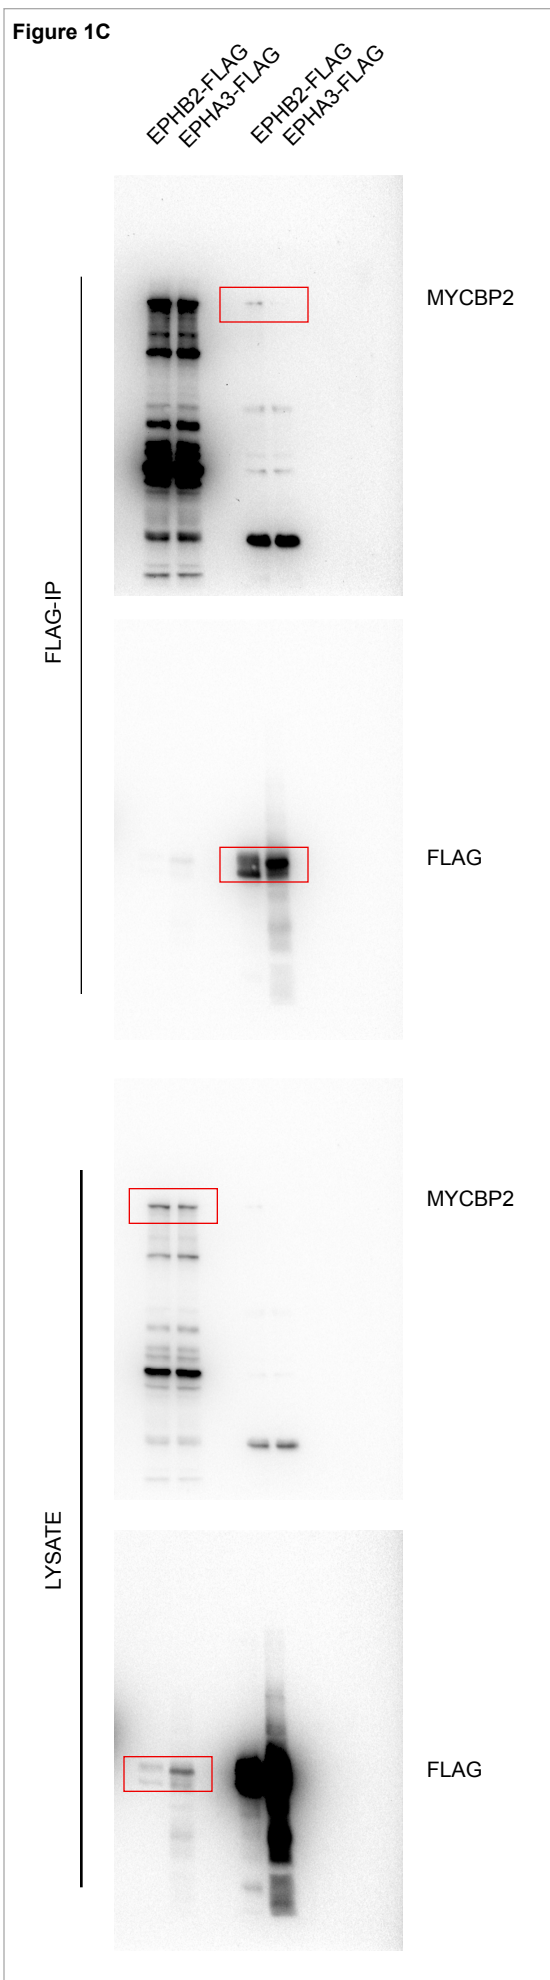

Figure 1D

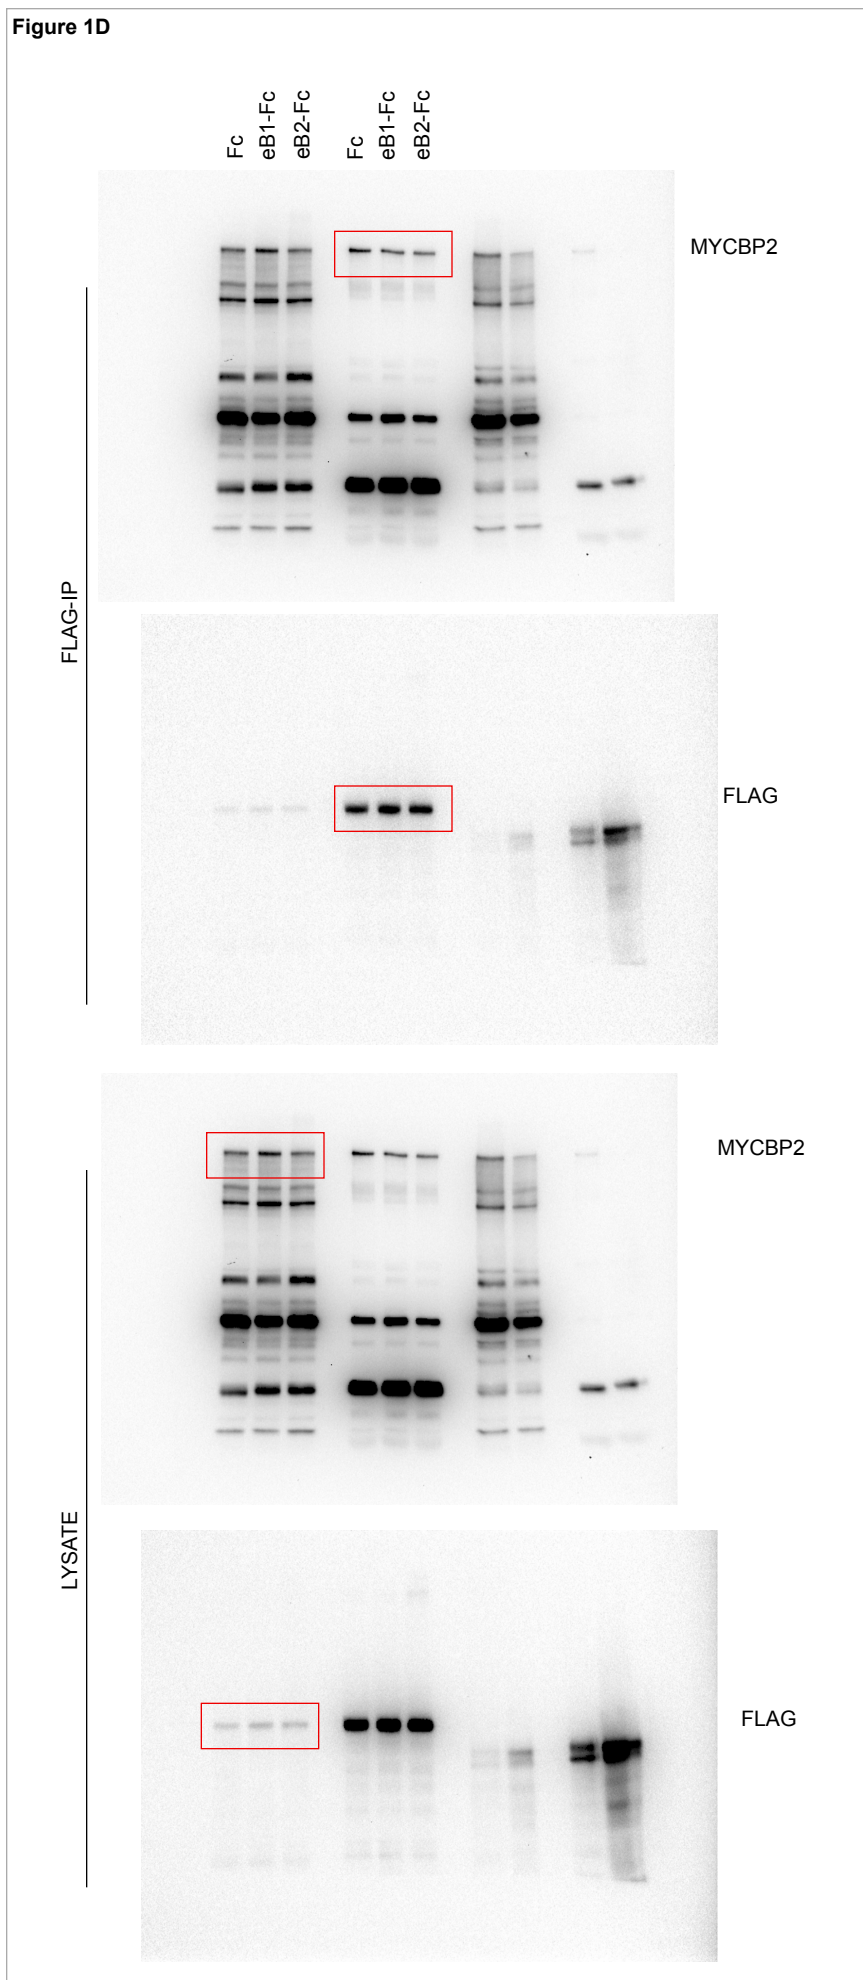

Supplement: fig1-data1 [file elife-89176-fig1-data1-v1.zip]

Figure 1F

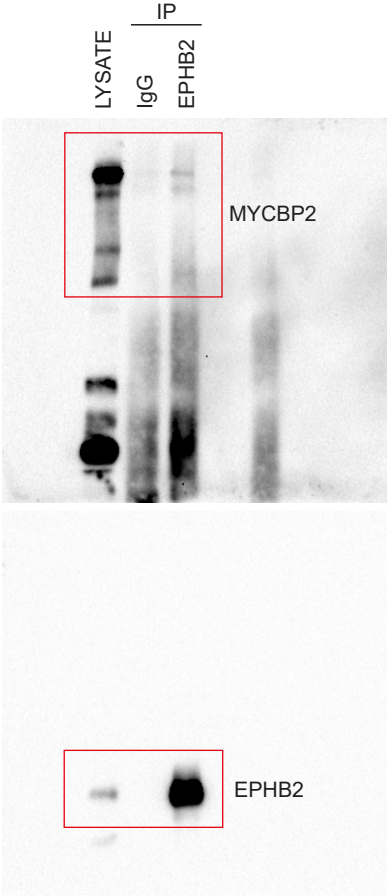

Figure 1G

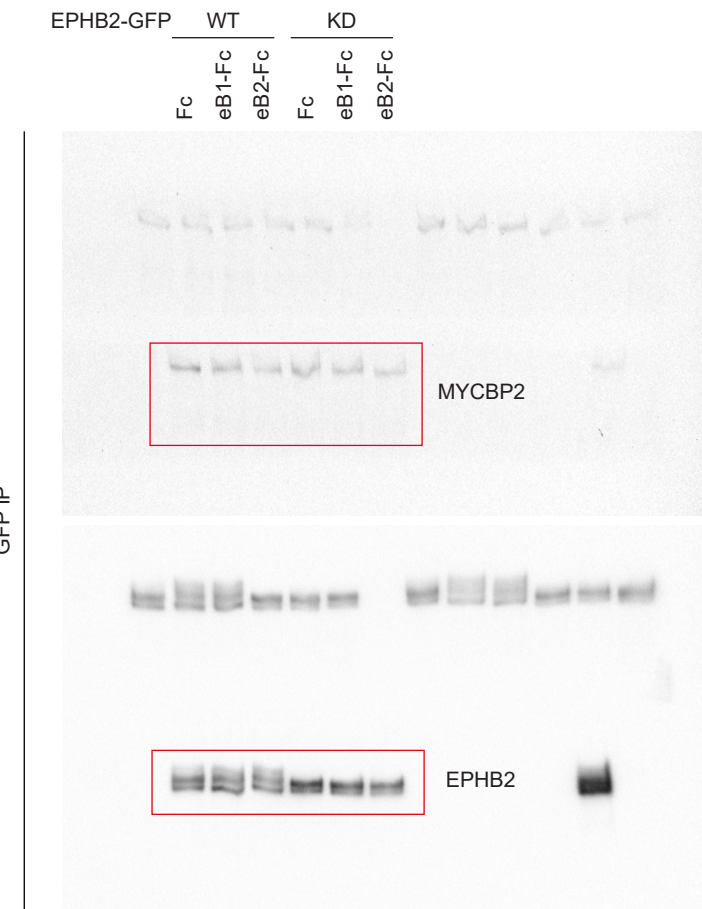

Supplement: fig1-data2 [file elife-89176-fig1-data2-v1.zip]

Figure 2A

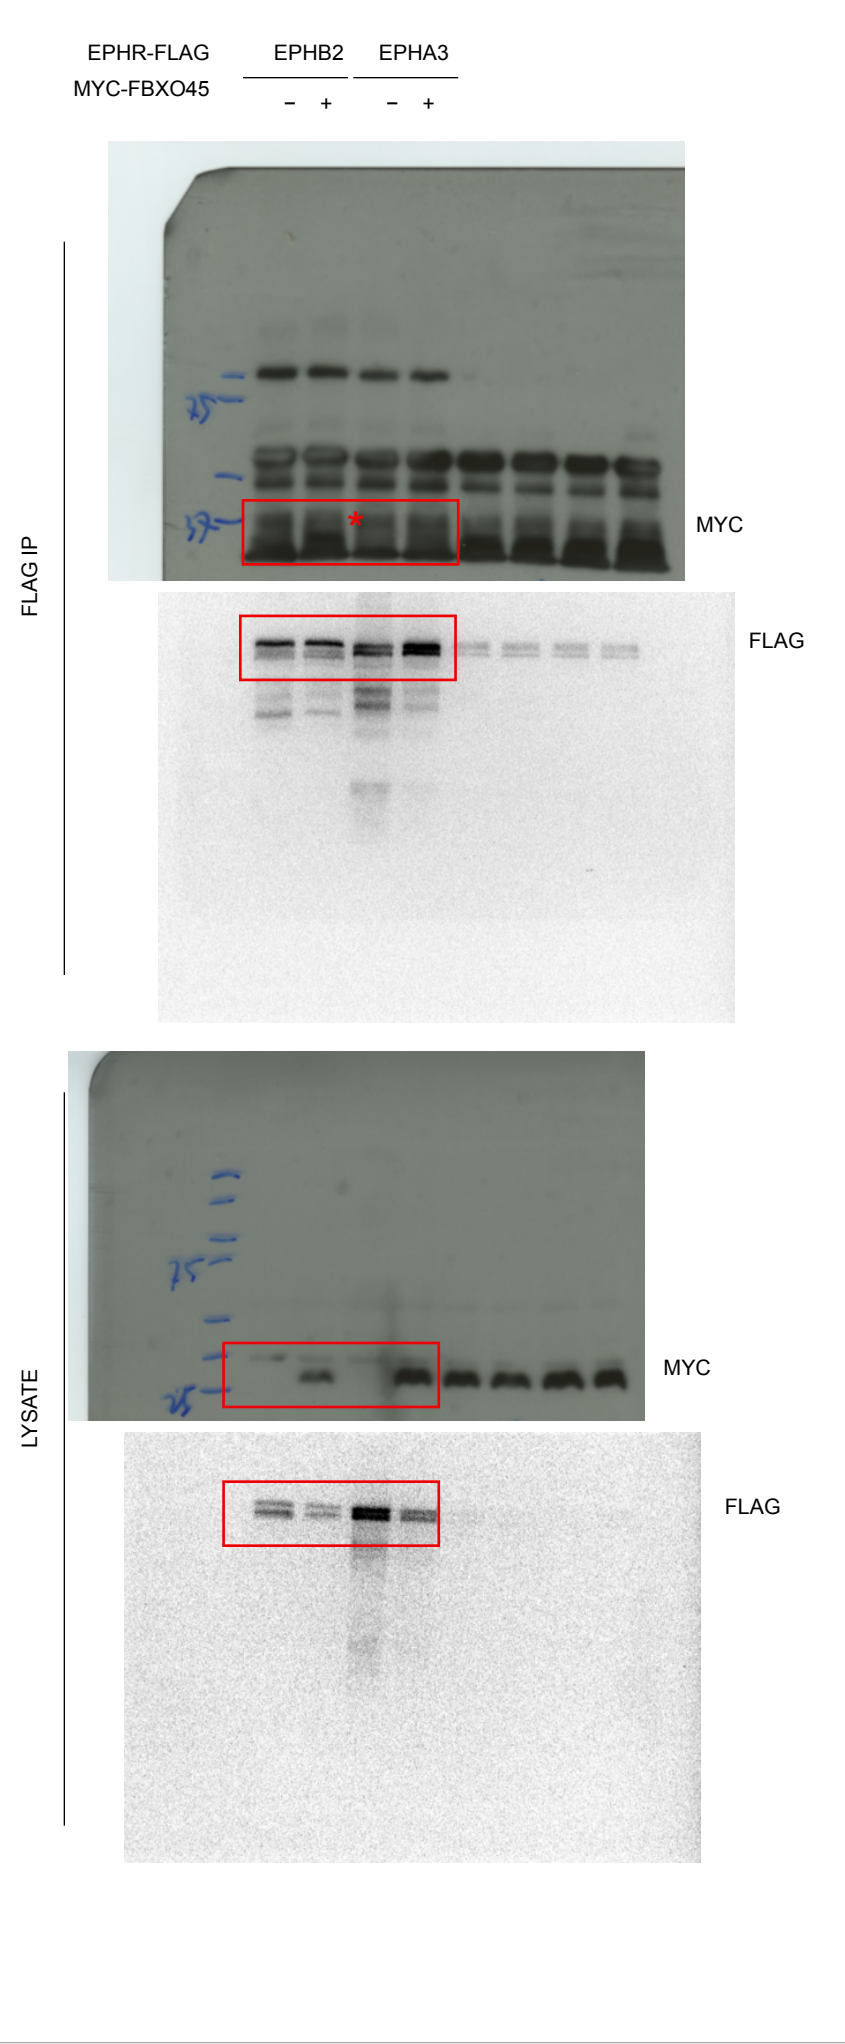

Figure 2B

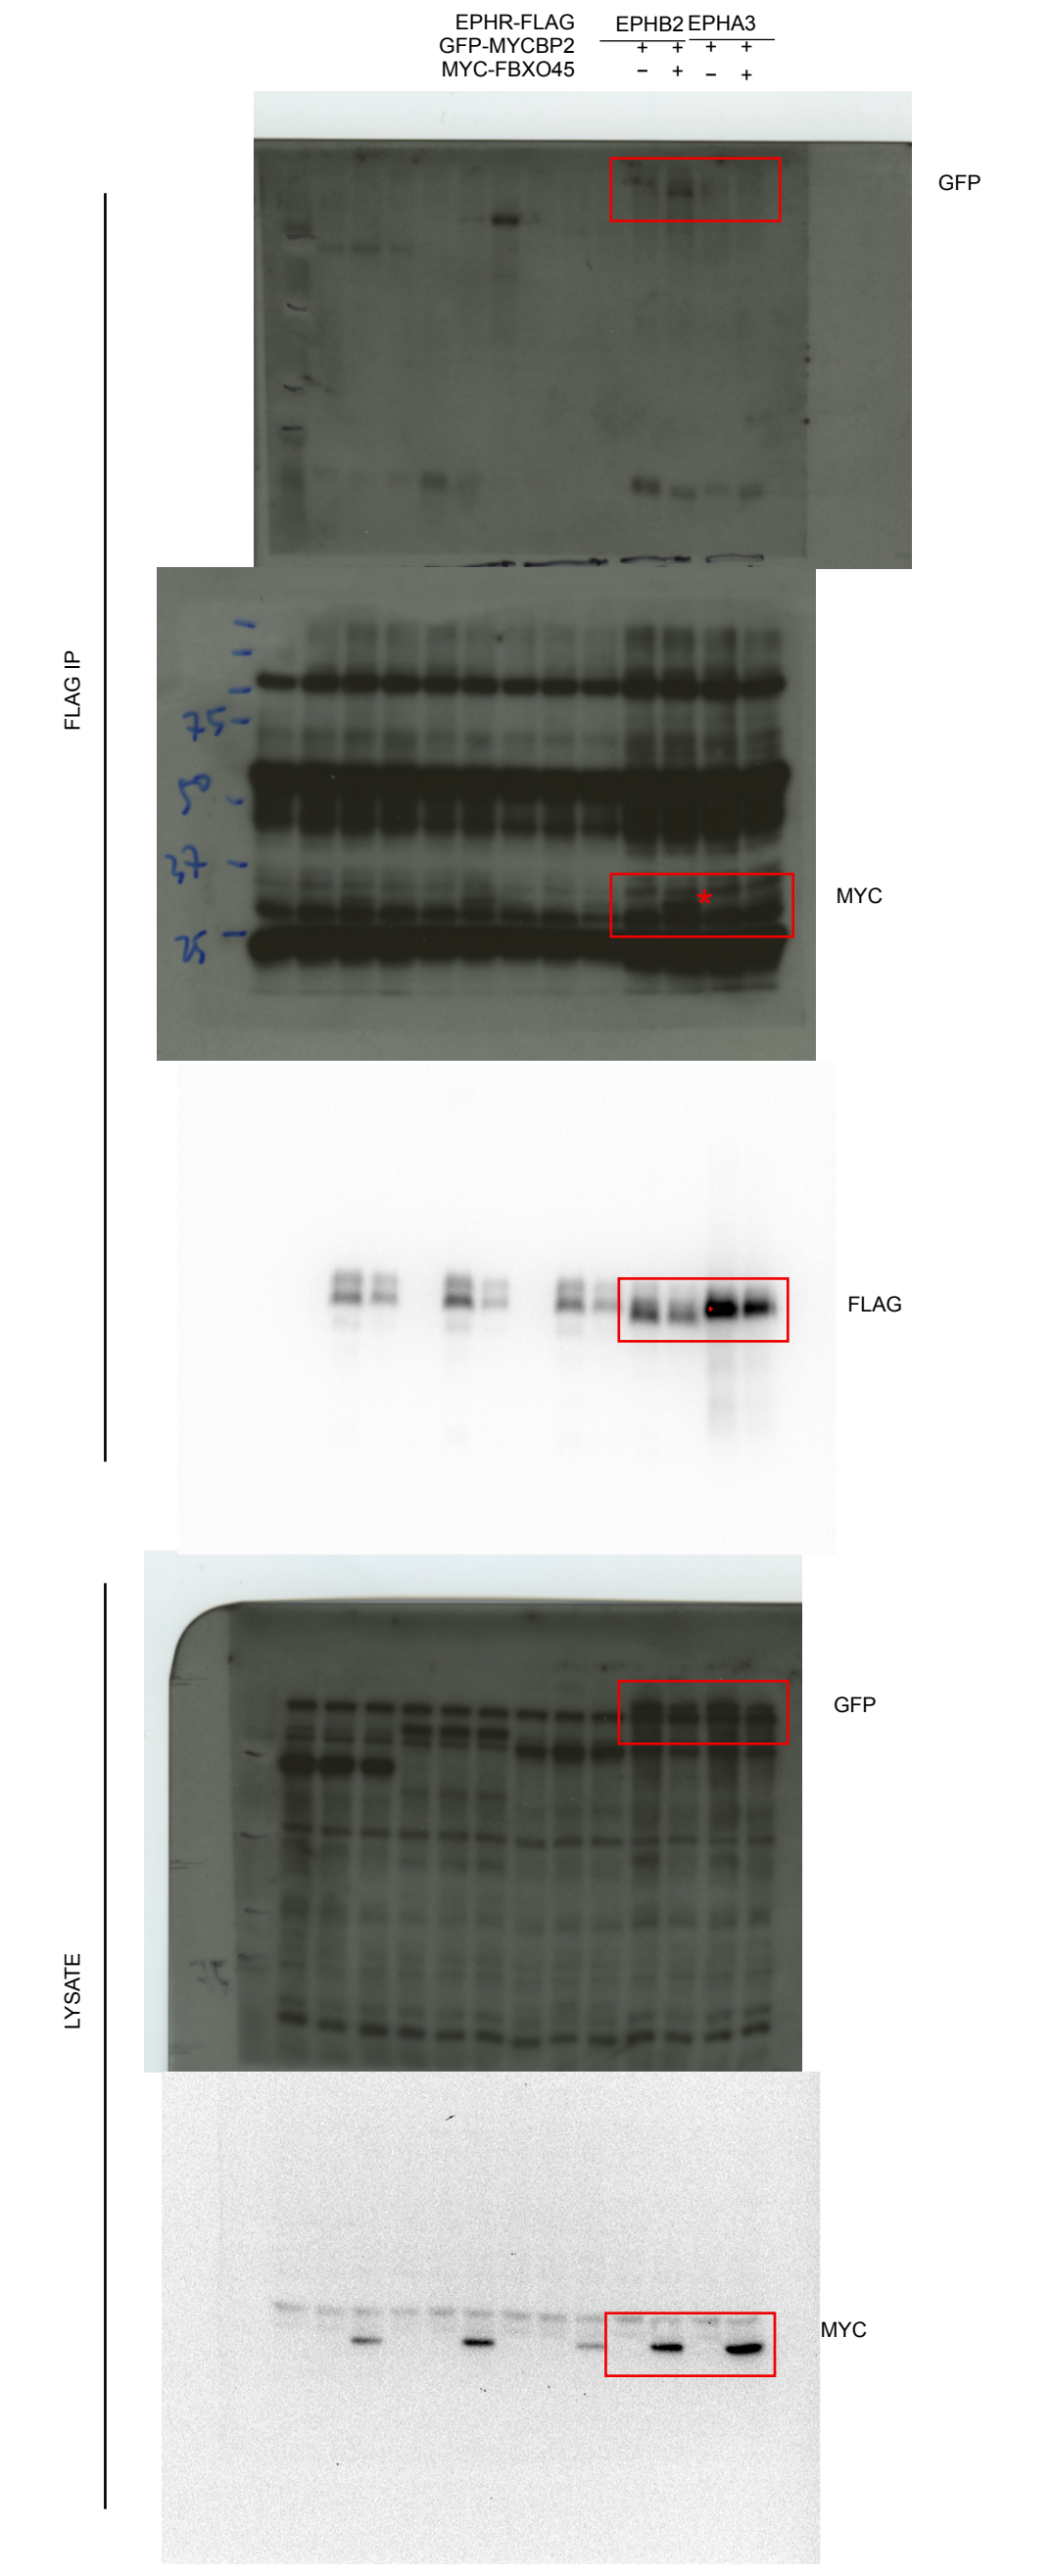

Figure 2E

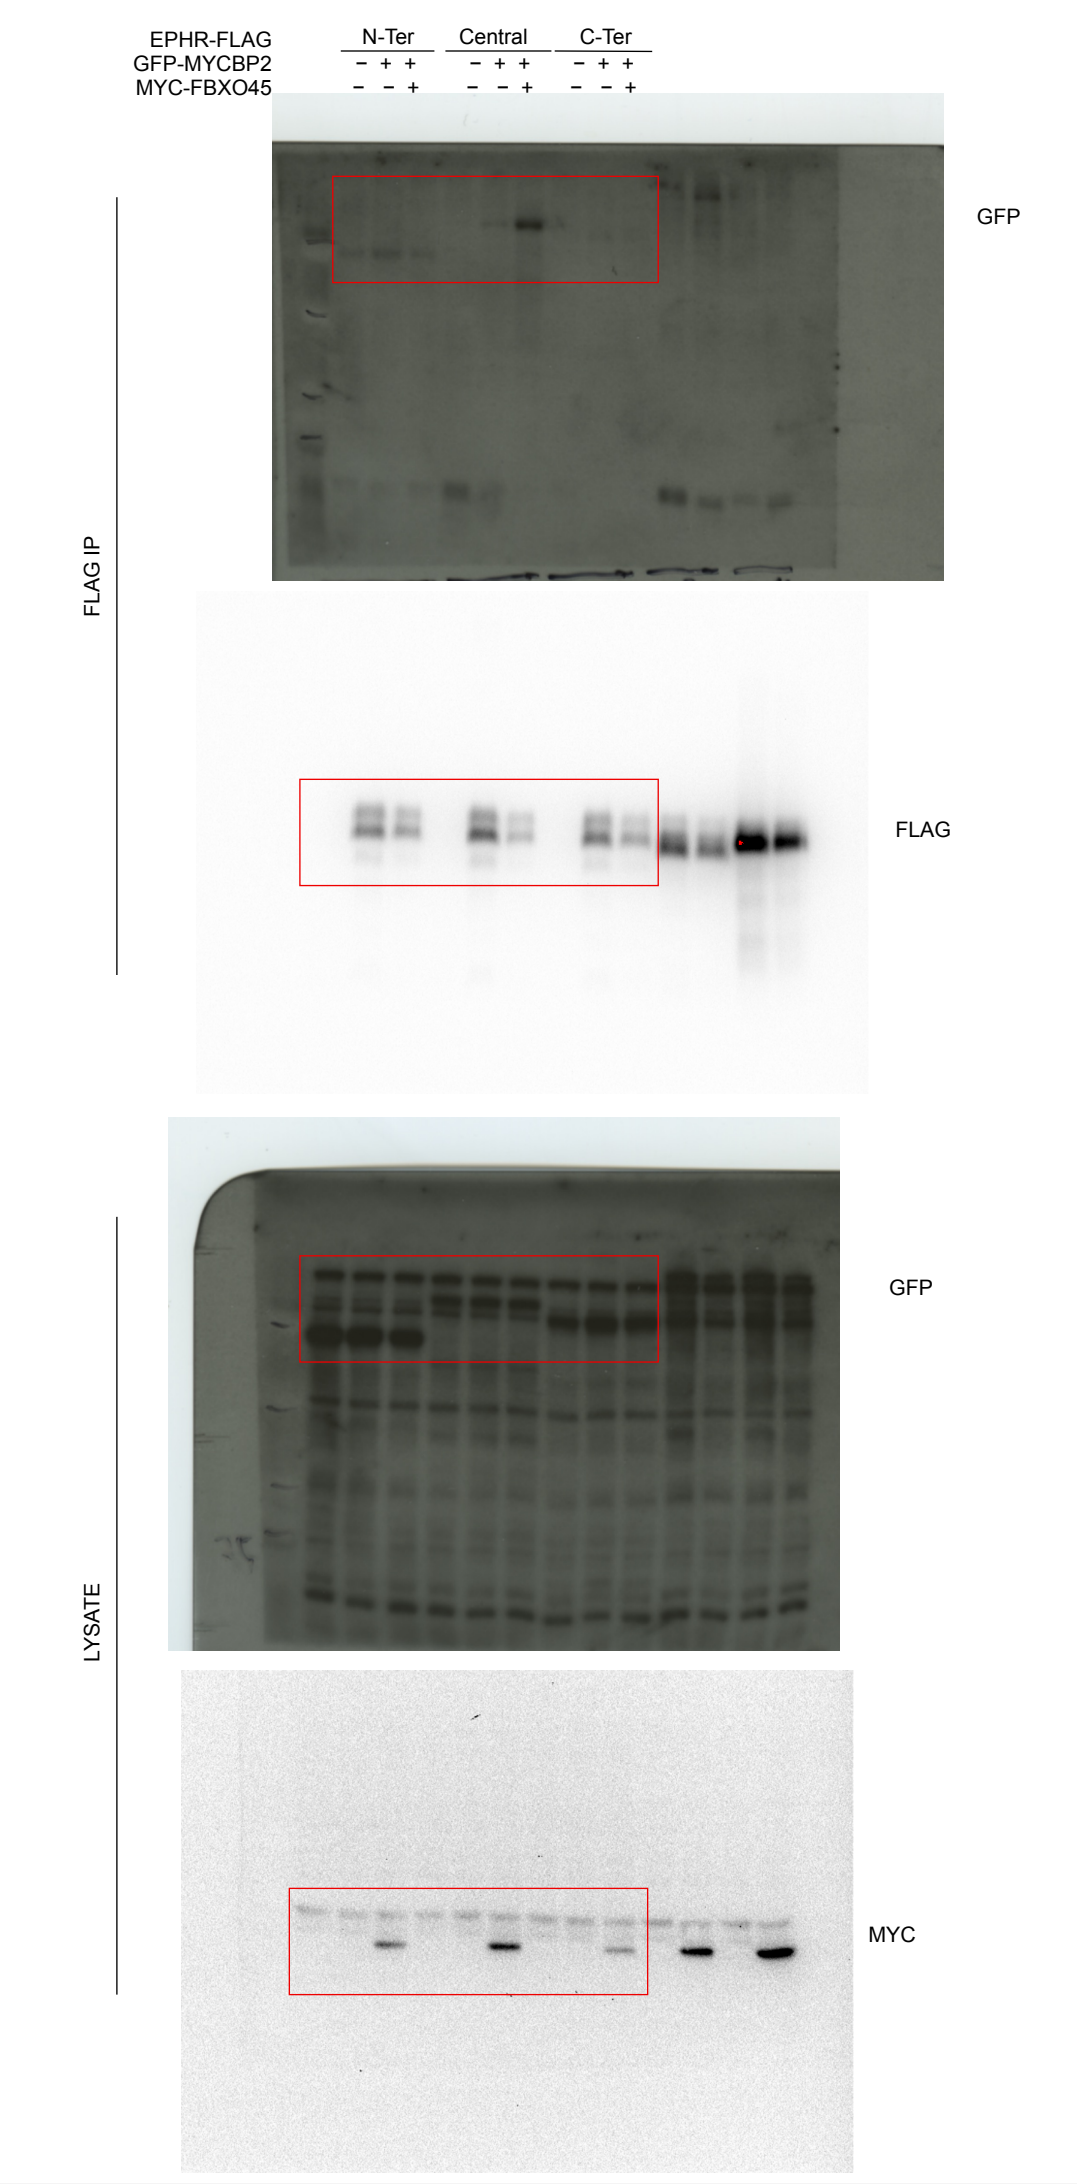

Supplement: fig2-data1 [file elife-89176-fig2-data1-v1.zip]

**Figure 2G**

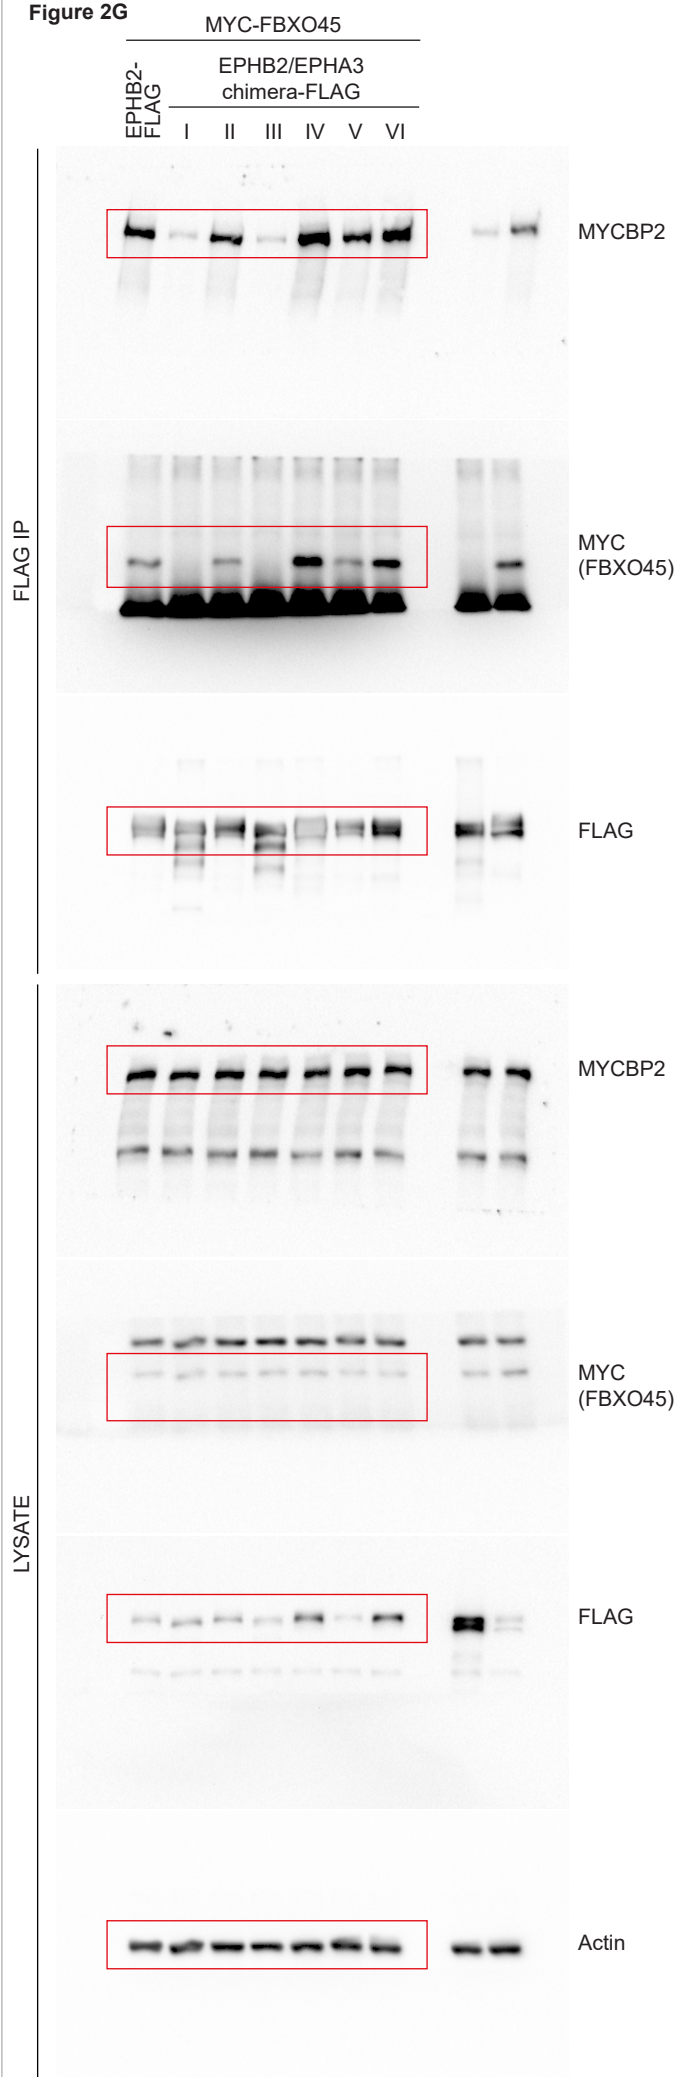

**Figure 2I**

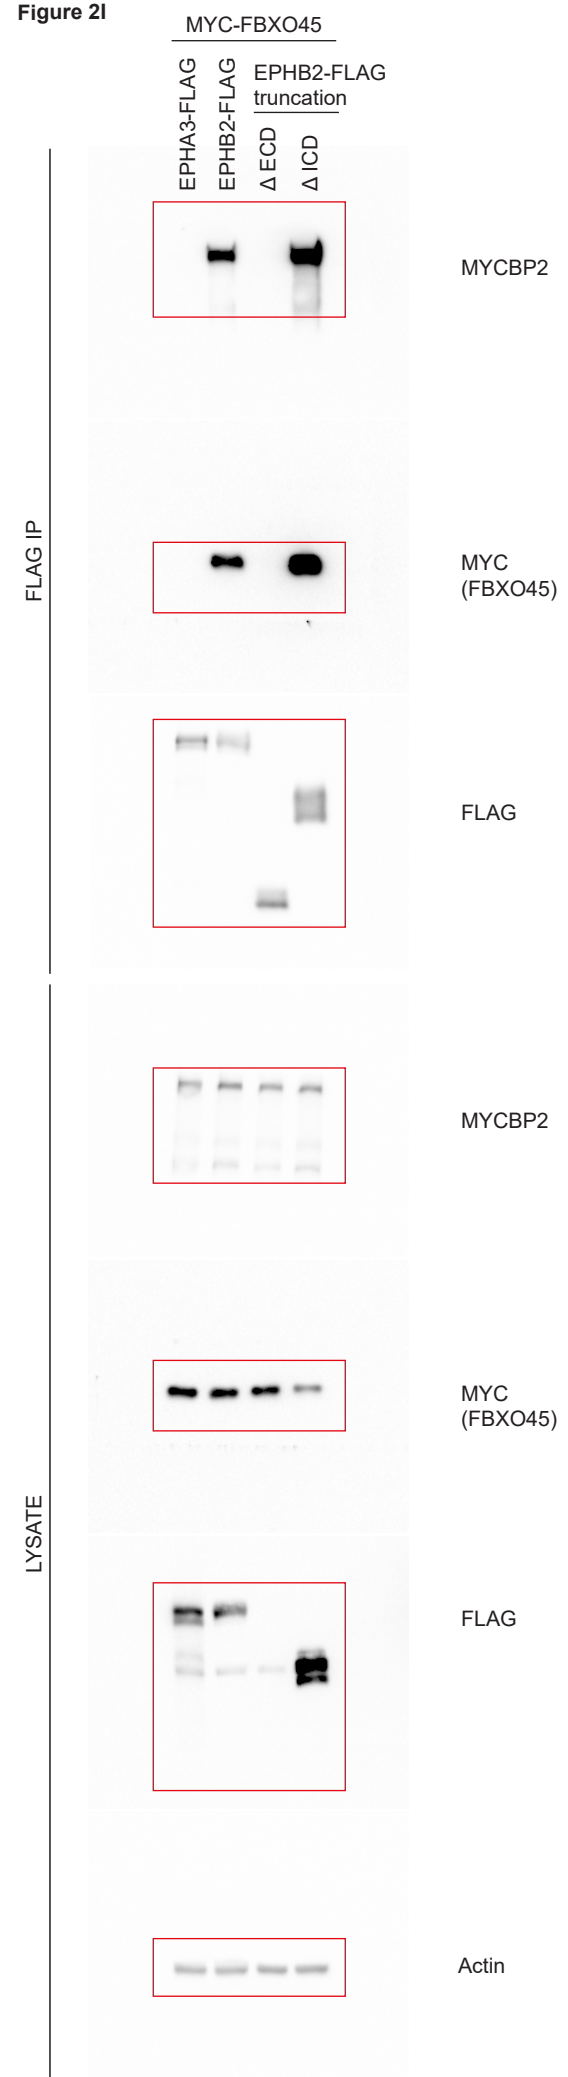

Supplement: fig2-data2 [file elife-89176-fig2-data2-v1.zip]

Figure 3B

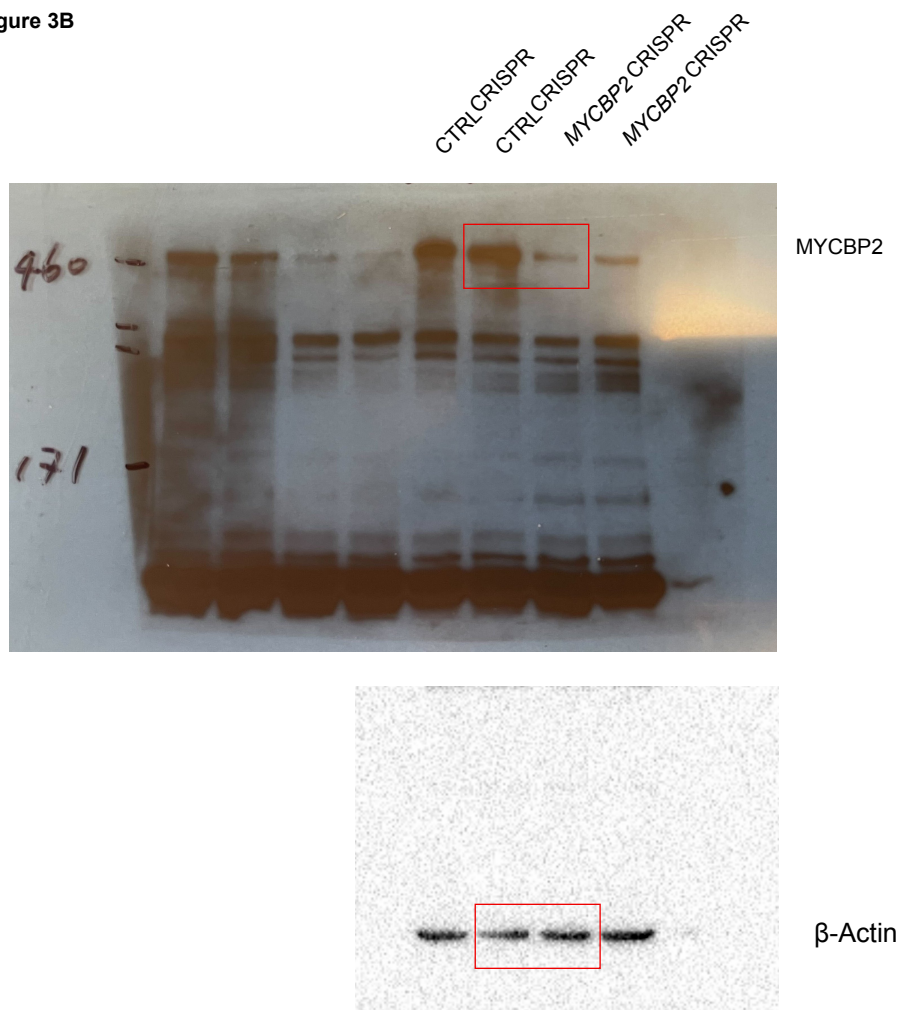

Supplement: fig3-data1 [file elife-89176-fig3-data1-v1.zip]

Figure 4A

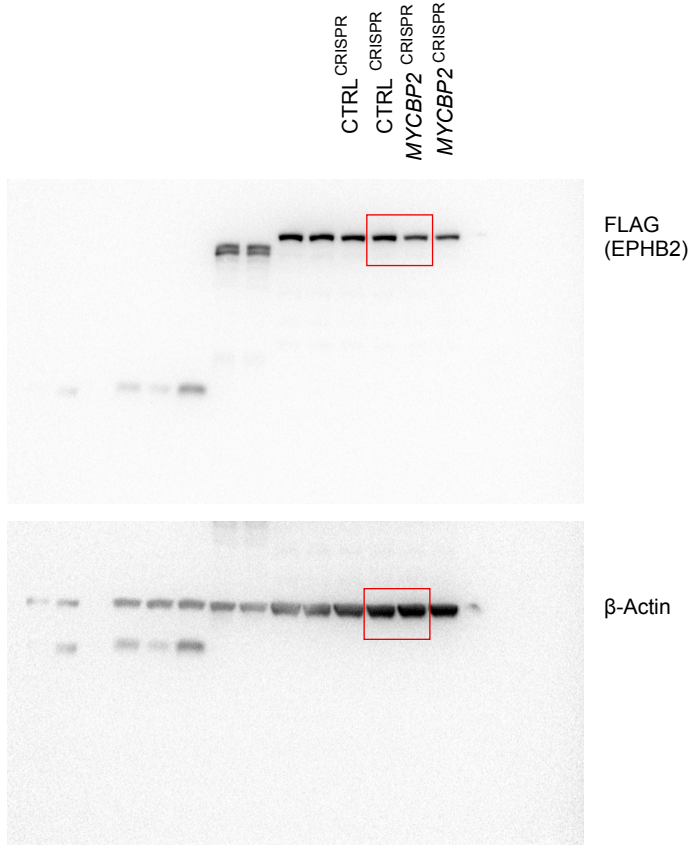

Figure 4B

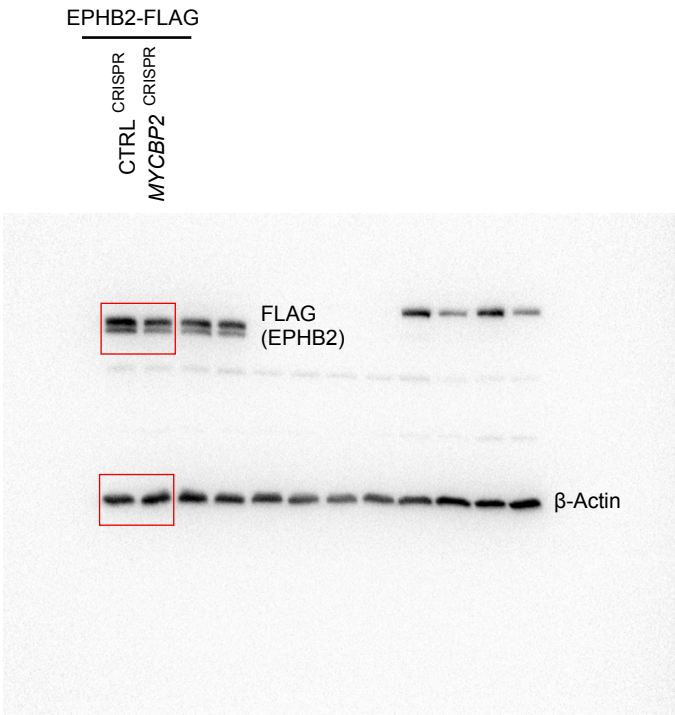

Figure 4D

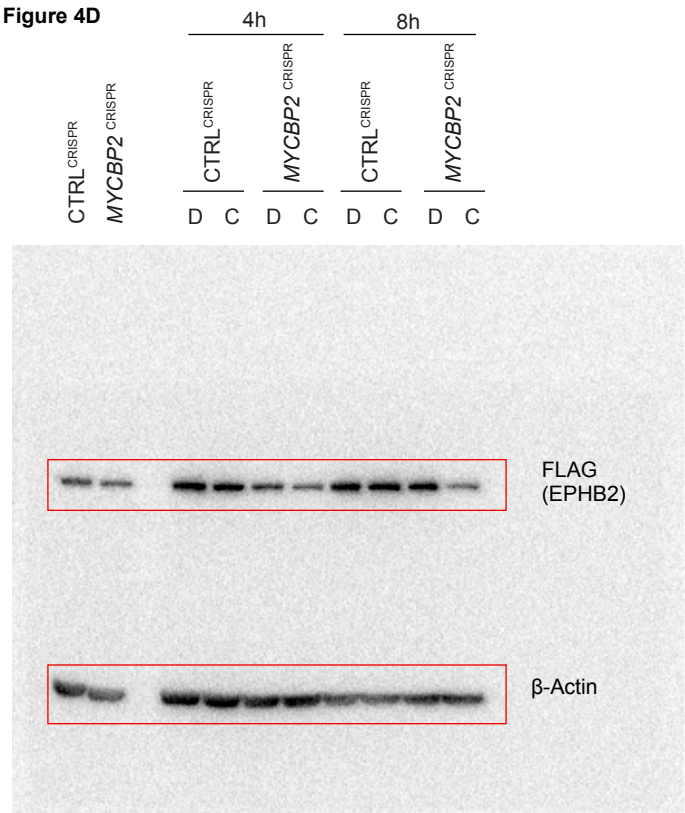

Supplement: fig4-data1 [file elife-89176-fig4-data1-v1.zip]

Figure 4F

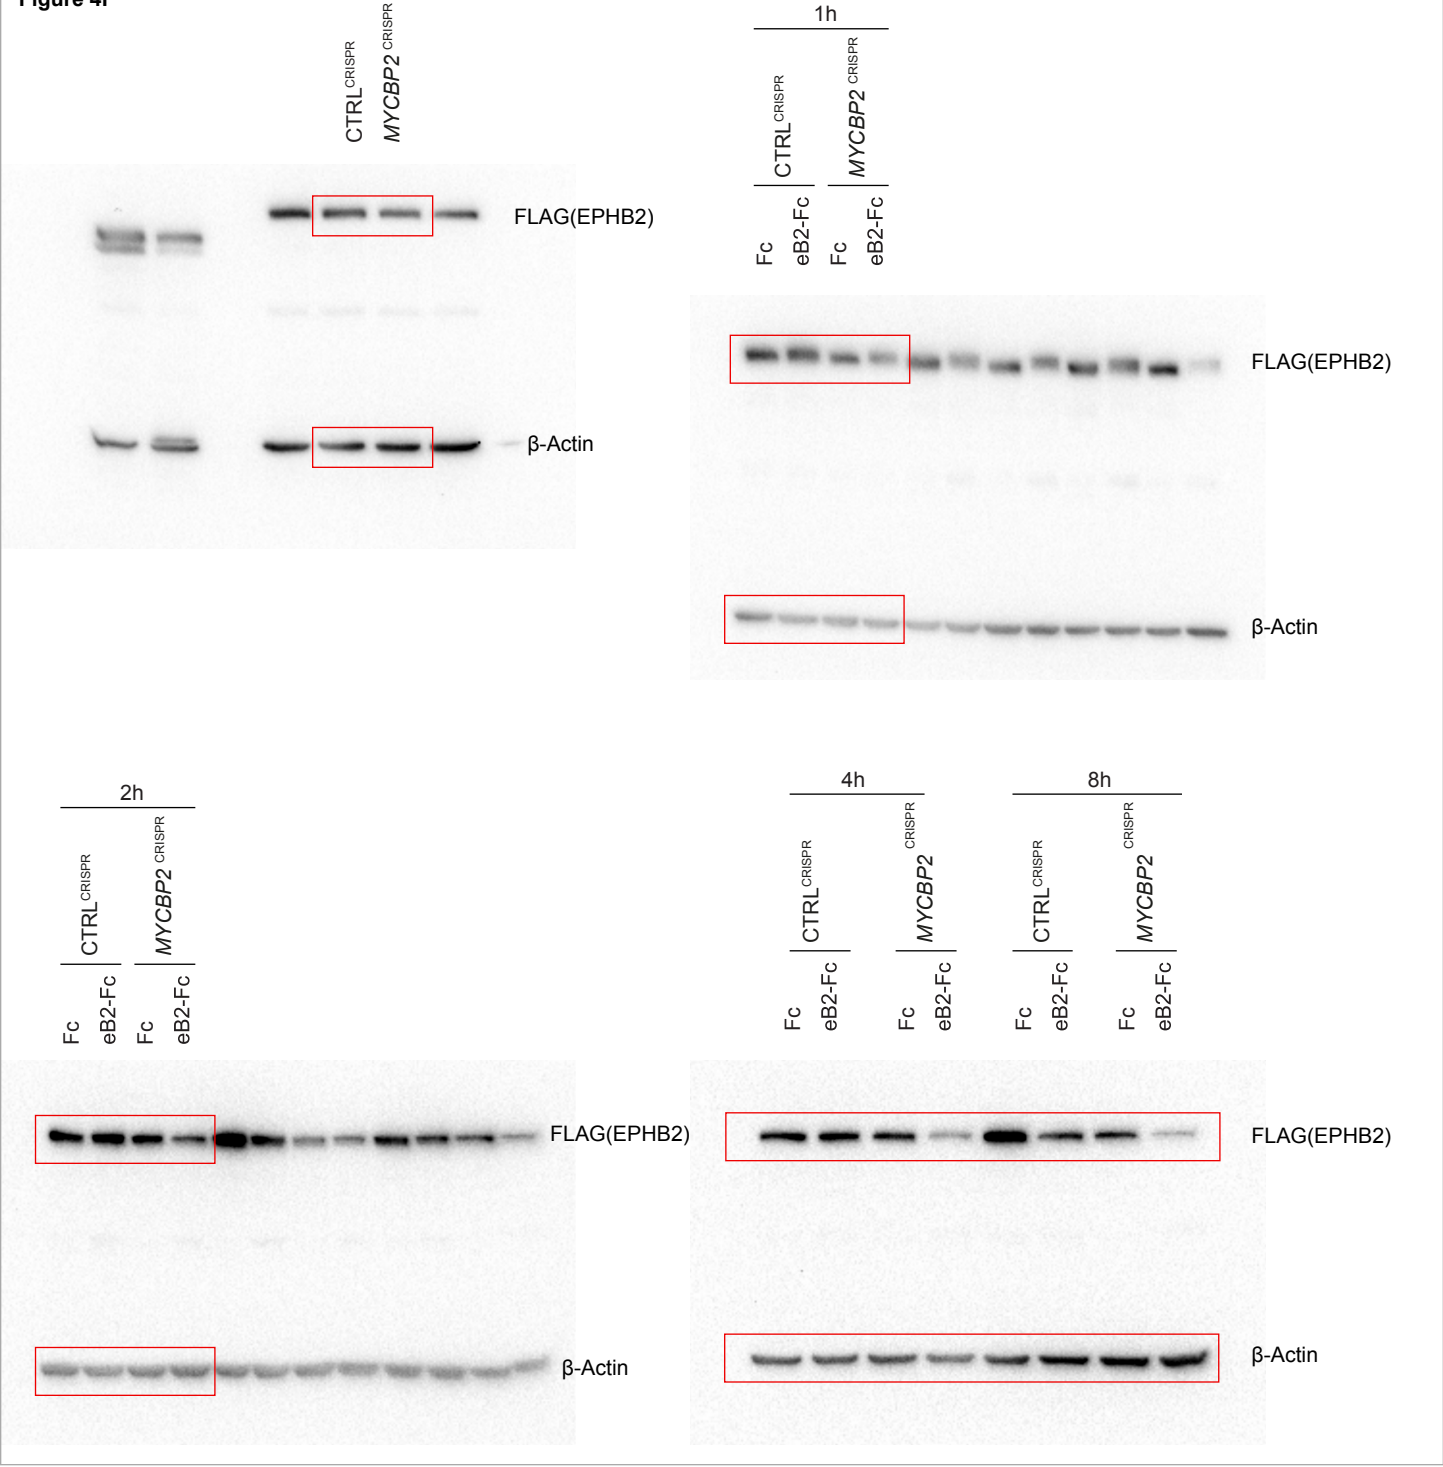

Supplement: fig4-data2 [file elife-89176-fig4-data2-v1.zip]

Figure 4H

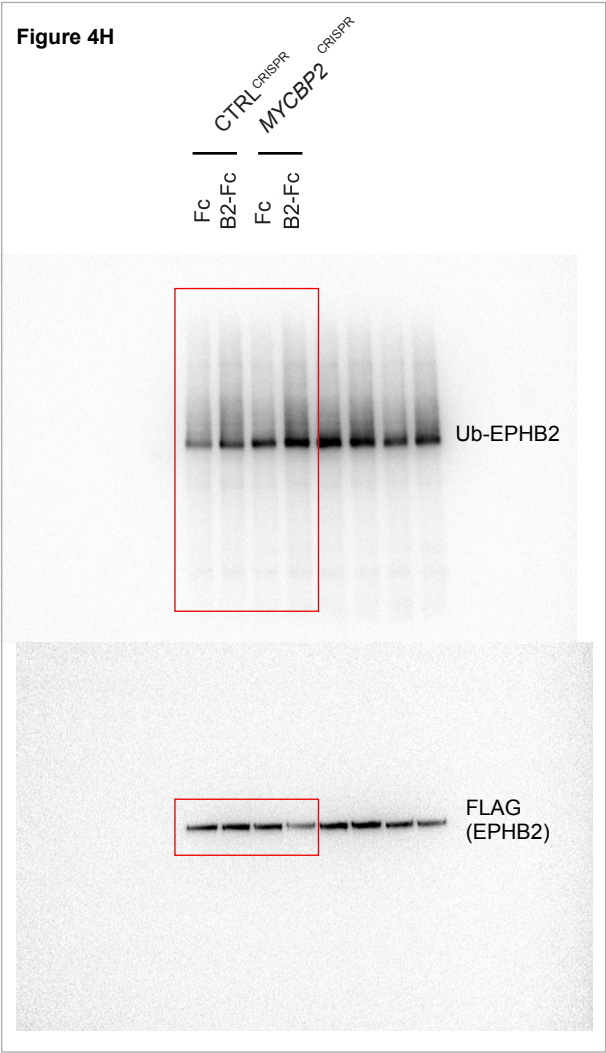

Figure 4J

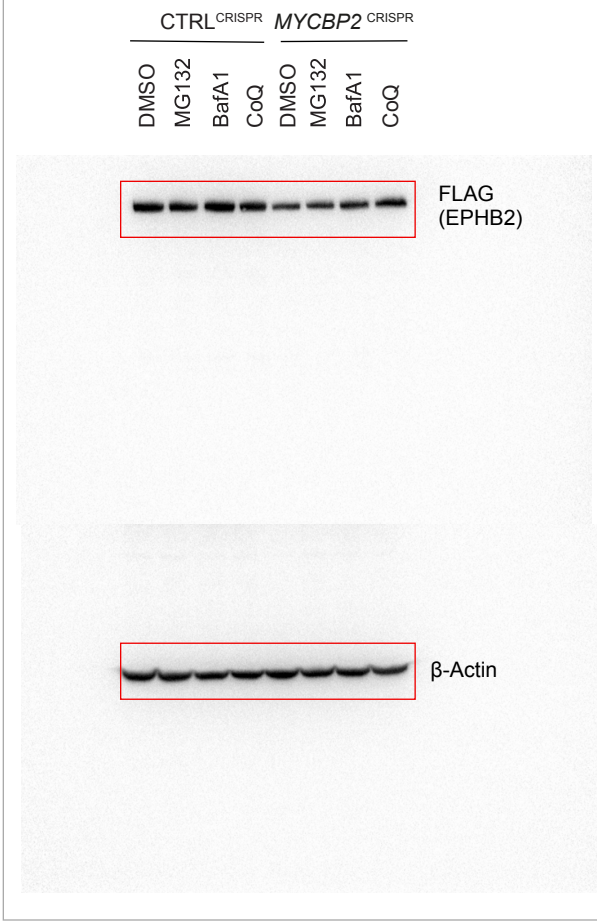

Supplement: fig4-data3 [file elife-89176-fig4-data3-v1.zip]

Figure 4L

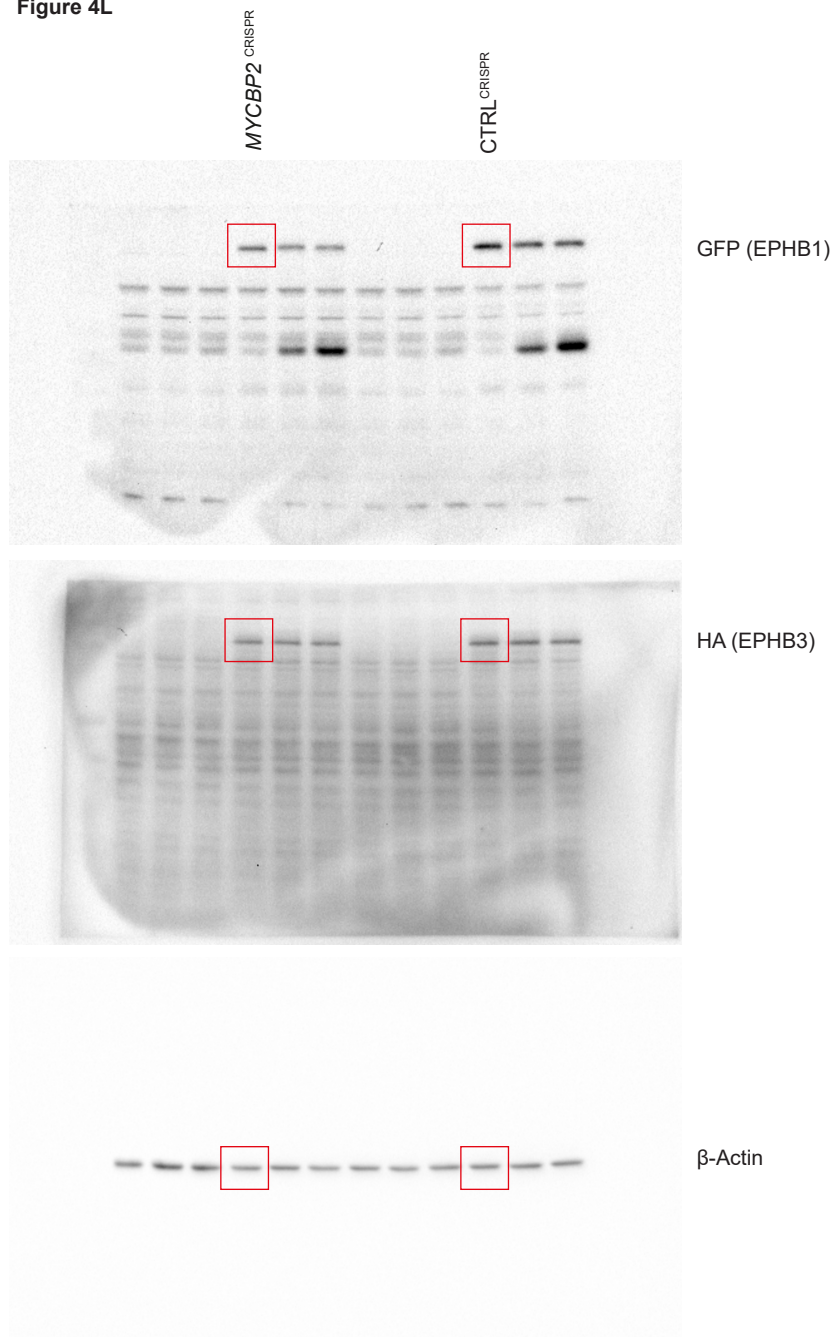

Supplement: fig4-data4 [file elife-89176-fig4-data4-v1.zip]

**Figure 5A**

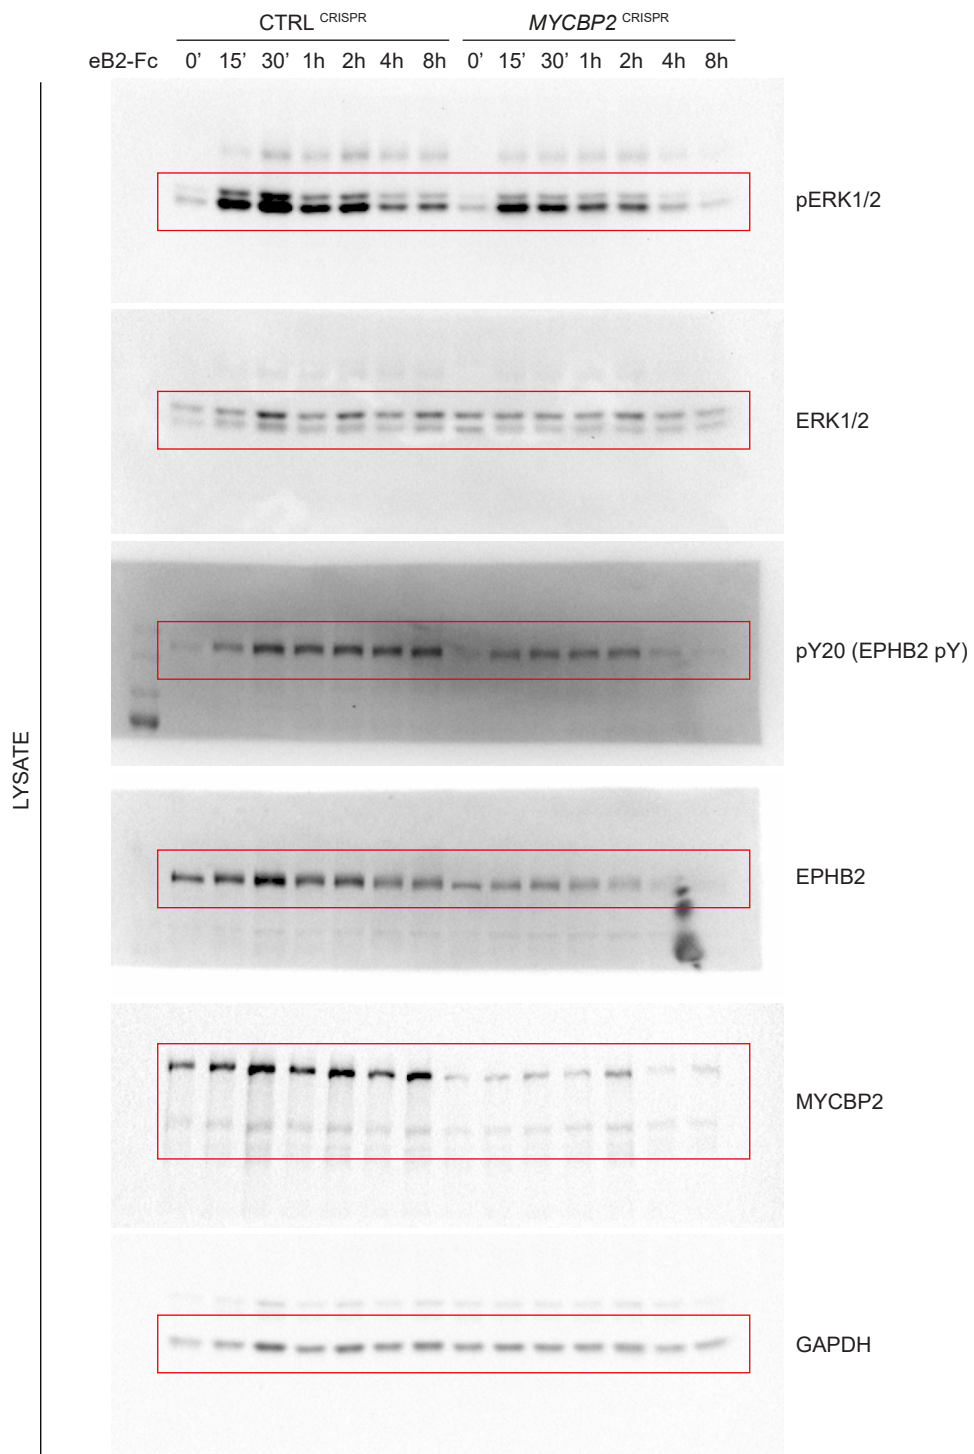

Supplement: fig5-data1 [file elife-89176-fig5-data1-v1.zip]

Figure 6B

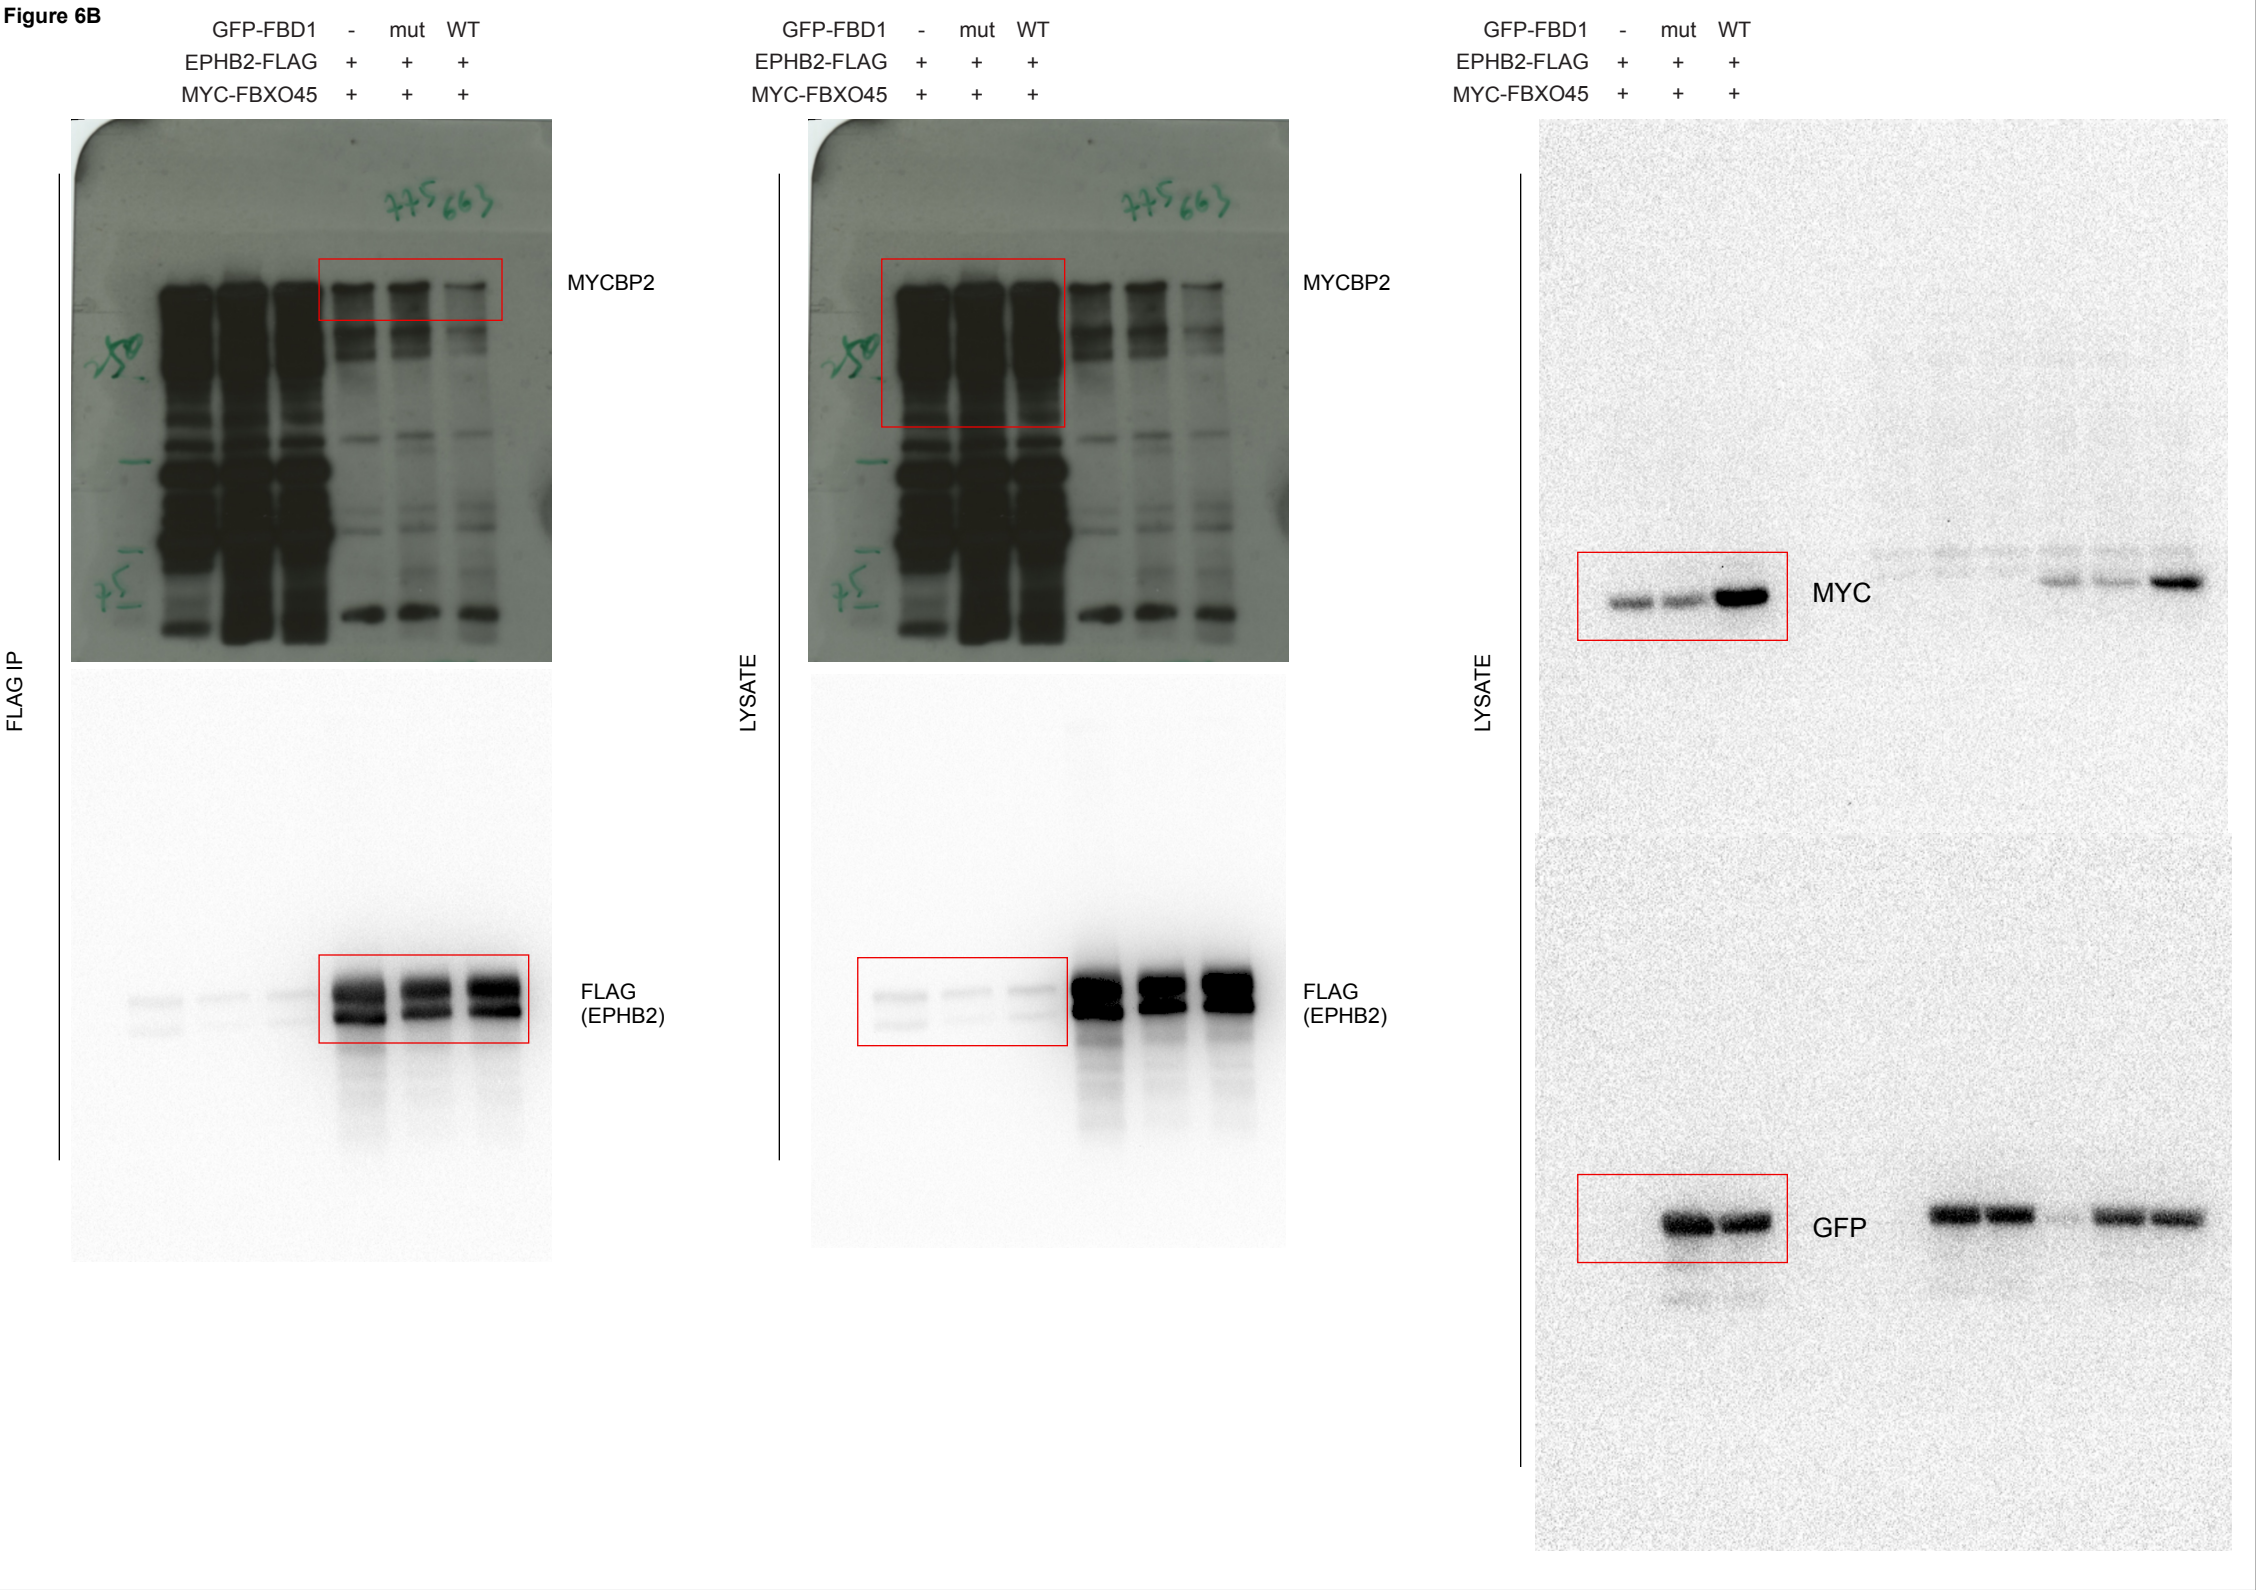

Supplement: fig6-data1 [file elife-89176-fig6-data1-v1.zip]
